# Supplementary material for: Measuring robust functional connectivity from resting-state MEG using amplitude and entropy correlation across frequency bands and temporal scales
Source: PubMed Central journal article supplement (PMC7836237; doi:10.1016/j.neuroimage.2020.117551), 2021-02-01
Supplement: mmc1.pdf [file mmc1.pdf]

# Supplementary material: Measuring robust functional connectivity from resting-state MEG using amplitude and entropy correlation across frequency-bands and temporal scales

Megan Godfrey, Krish D. Singh

*CUBRIC, School of Psychology, Cardiff University, Cardiff, UK*

## Abstract

Supplementary figures to complement Figure 6 in the main article. The relationship between MRVE time-courses and oscillatory amplitude is shown here across the whole brain, including all frequency bands and MRVE scale frequencies used in the connectivity analysis.

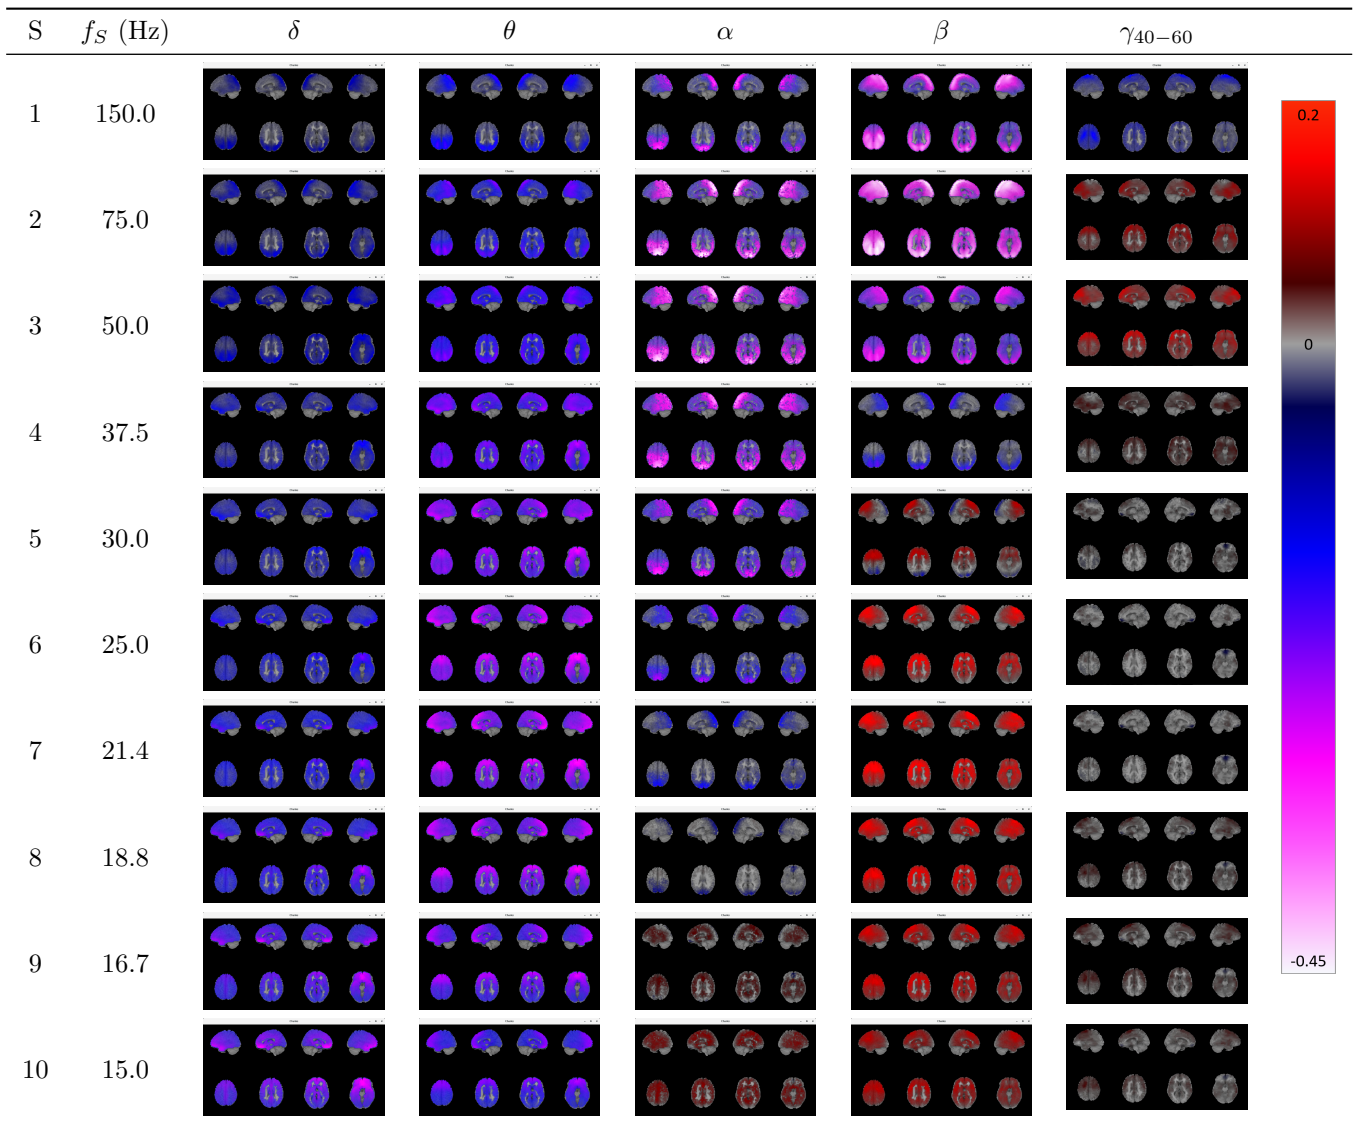

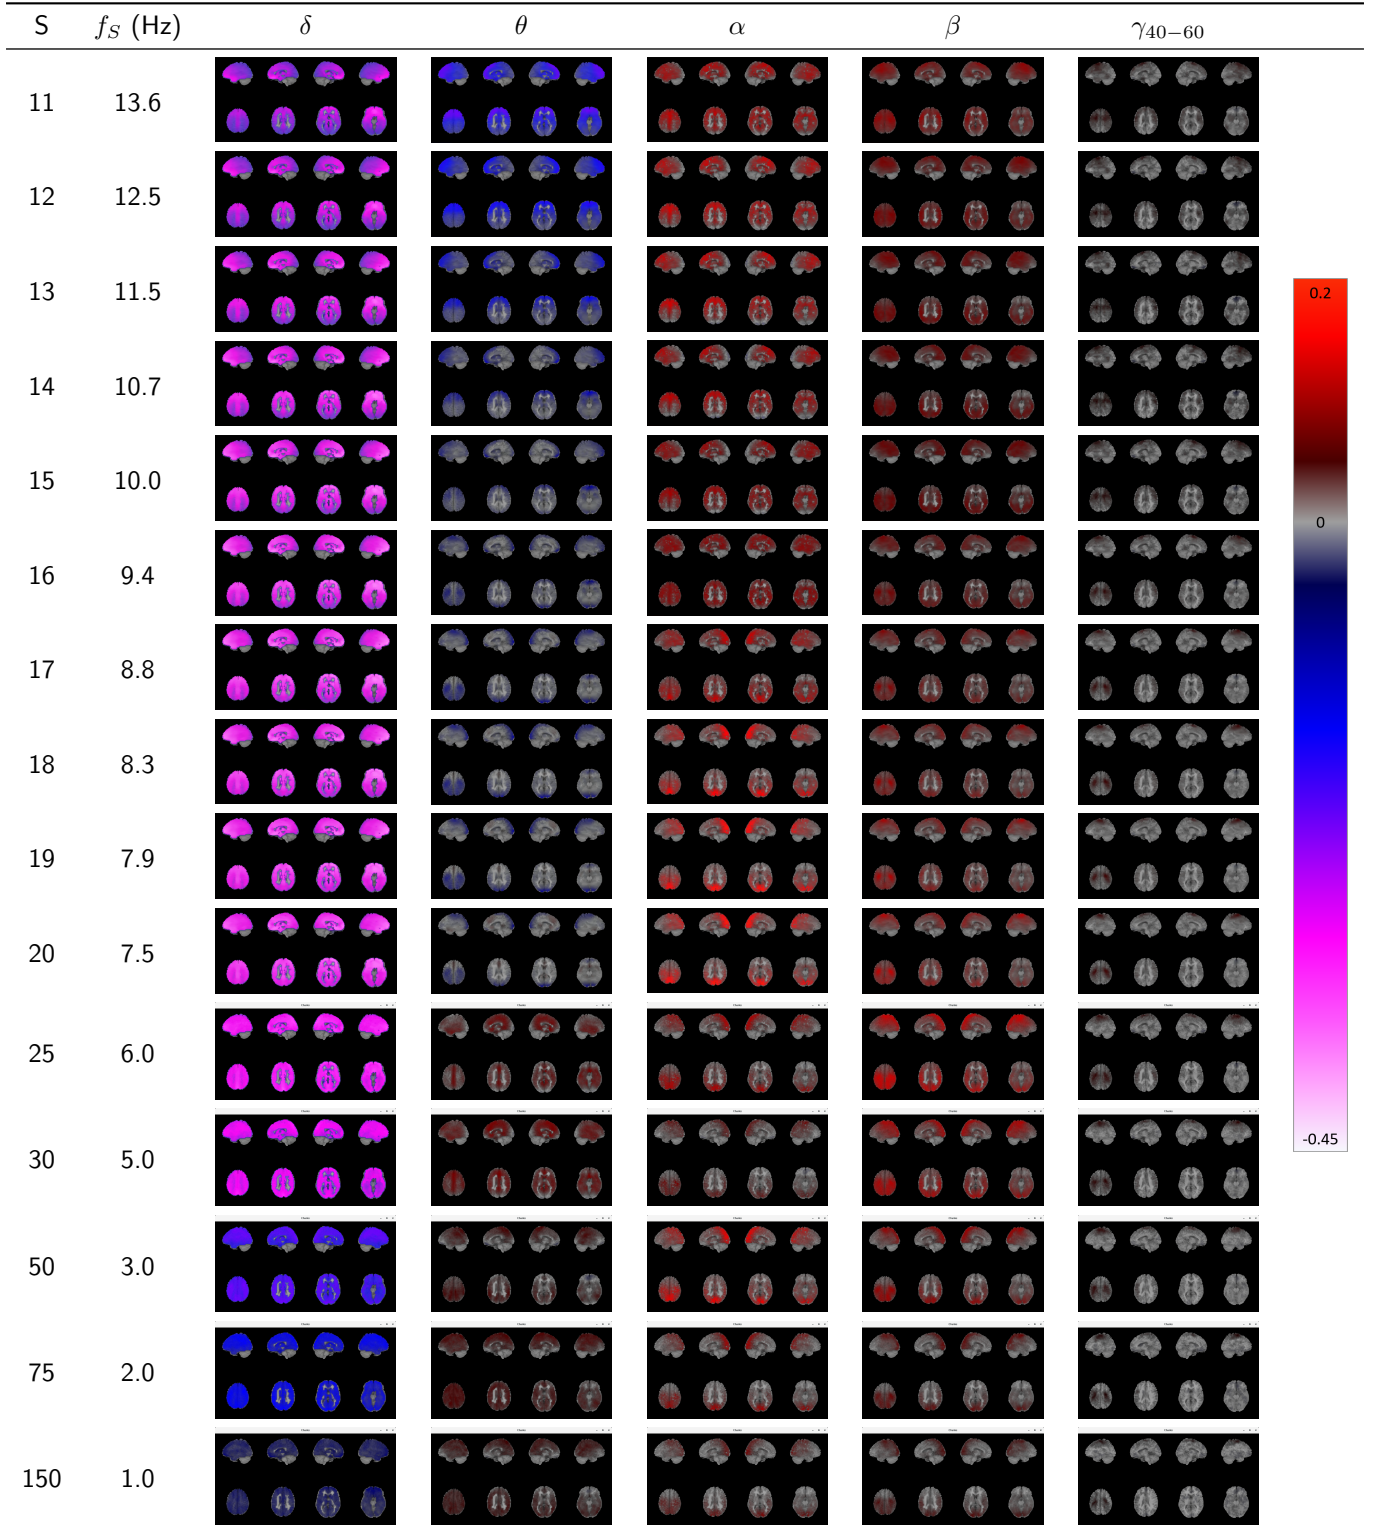

Figure 1: The whole-brain correlation between MRVE time-courses and oscillatory amplitude envelopes for scale frequencies  $f_S = 1-150\text{Hz}$  and frequency bands 1-4Hz ( $\delta$ ), 3-8Hz ( $\theta$ ), 8-13Hz ( $\alpha$ ), 13-30Hz ( $\beta$ ) and 40-60Hz ( $\gamma_{40-60}$ ). Correlation was found at each voxel for each participant and transformed to a z-score by applying the Fisher transformation. The 95% confidence interval was found for the z-scores calculated across all participants for each voxel. Average Pearson correlation values were found at each voxel where  $z = 0$  lay outside of this confidence interval and displayed on a template brain as indicated by the colour bar.

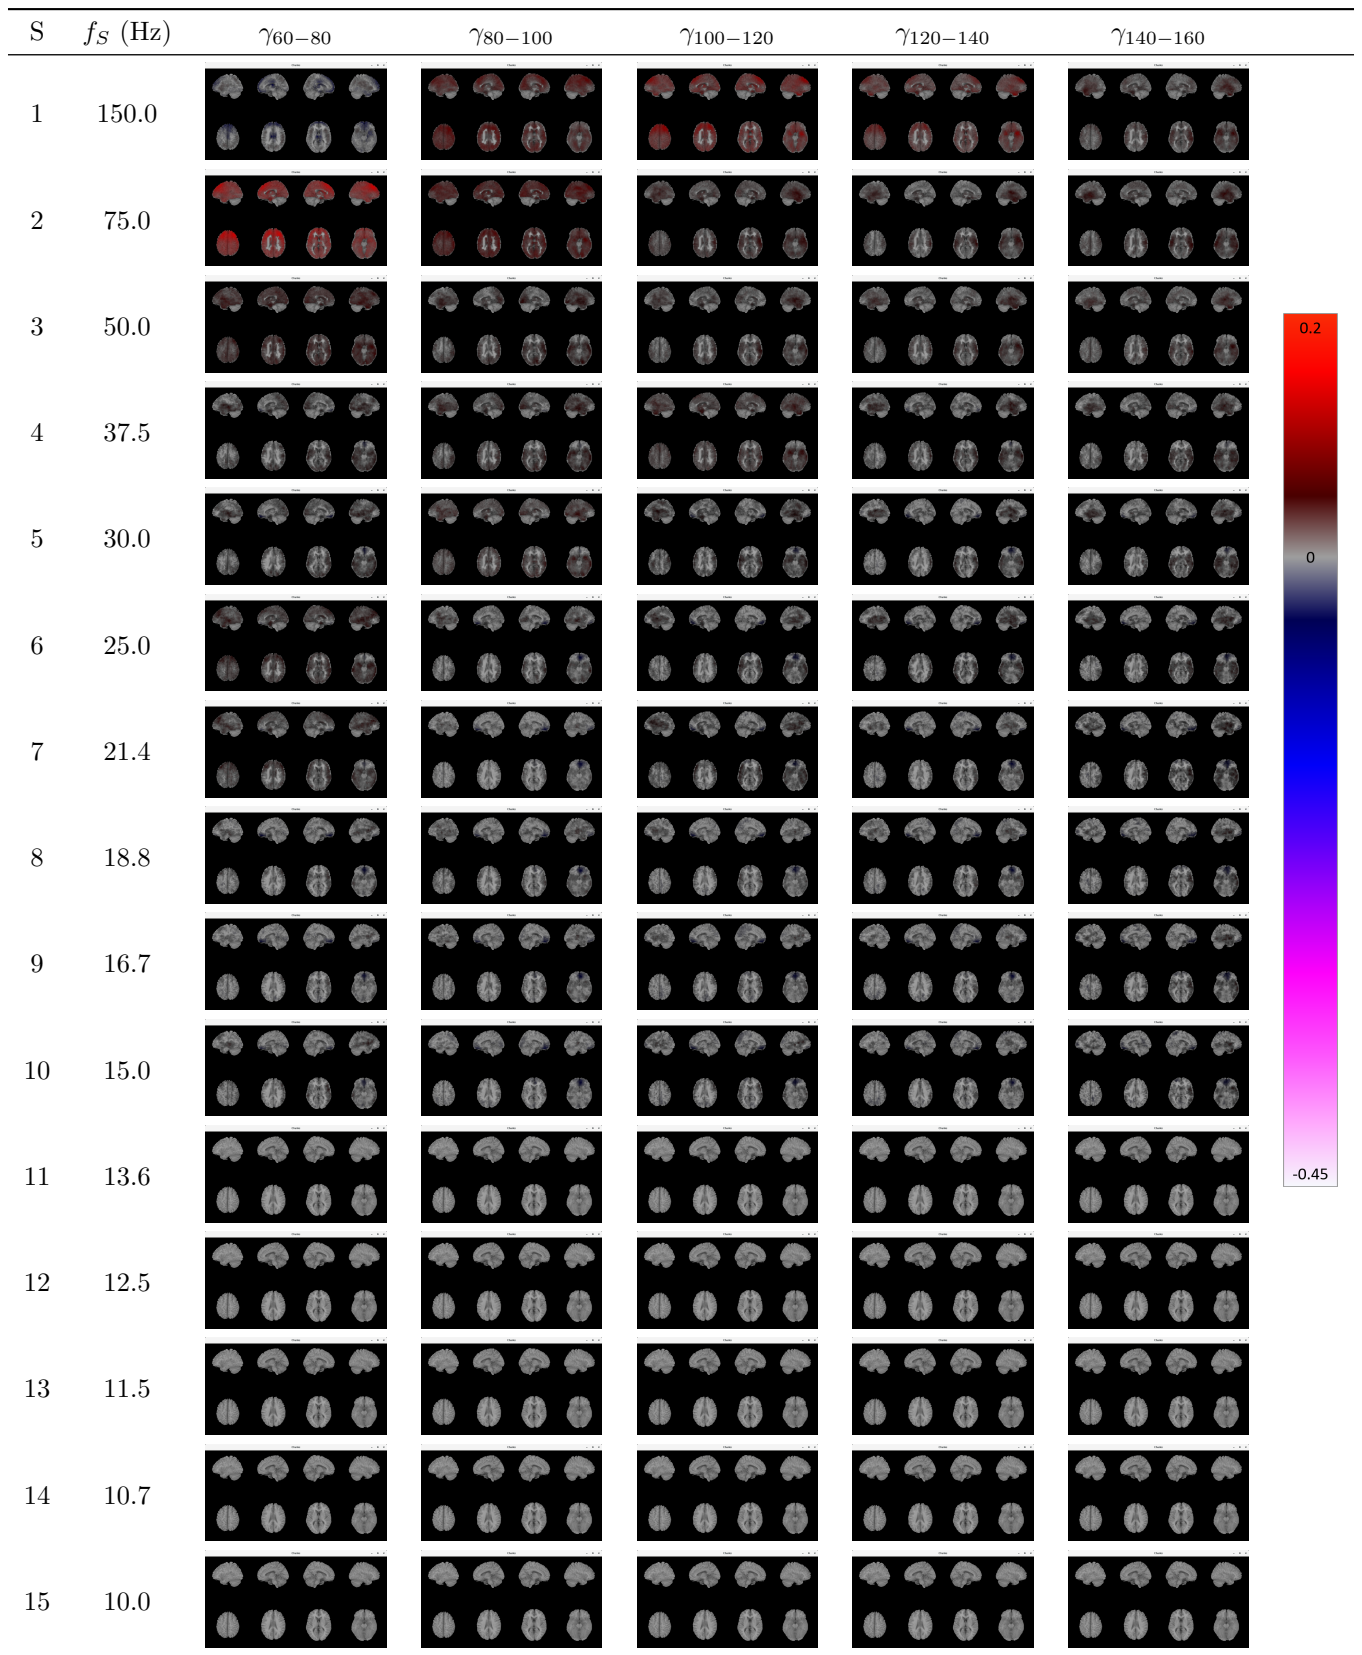

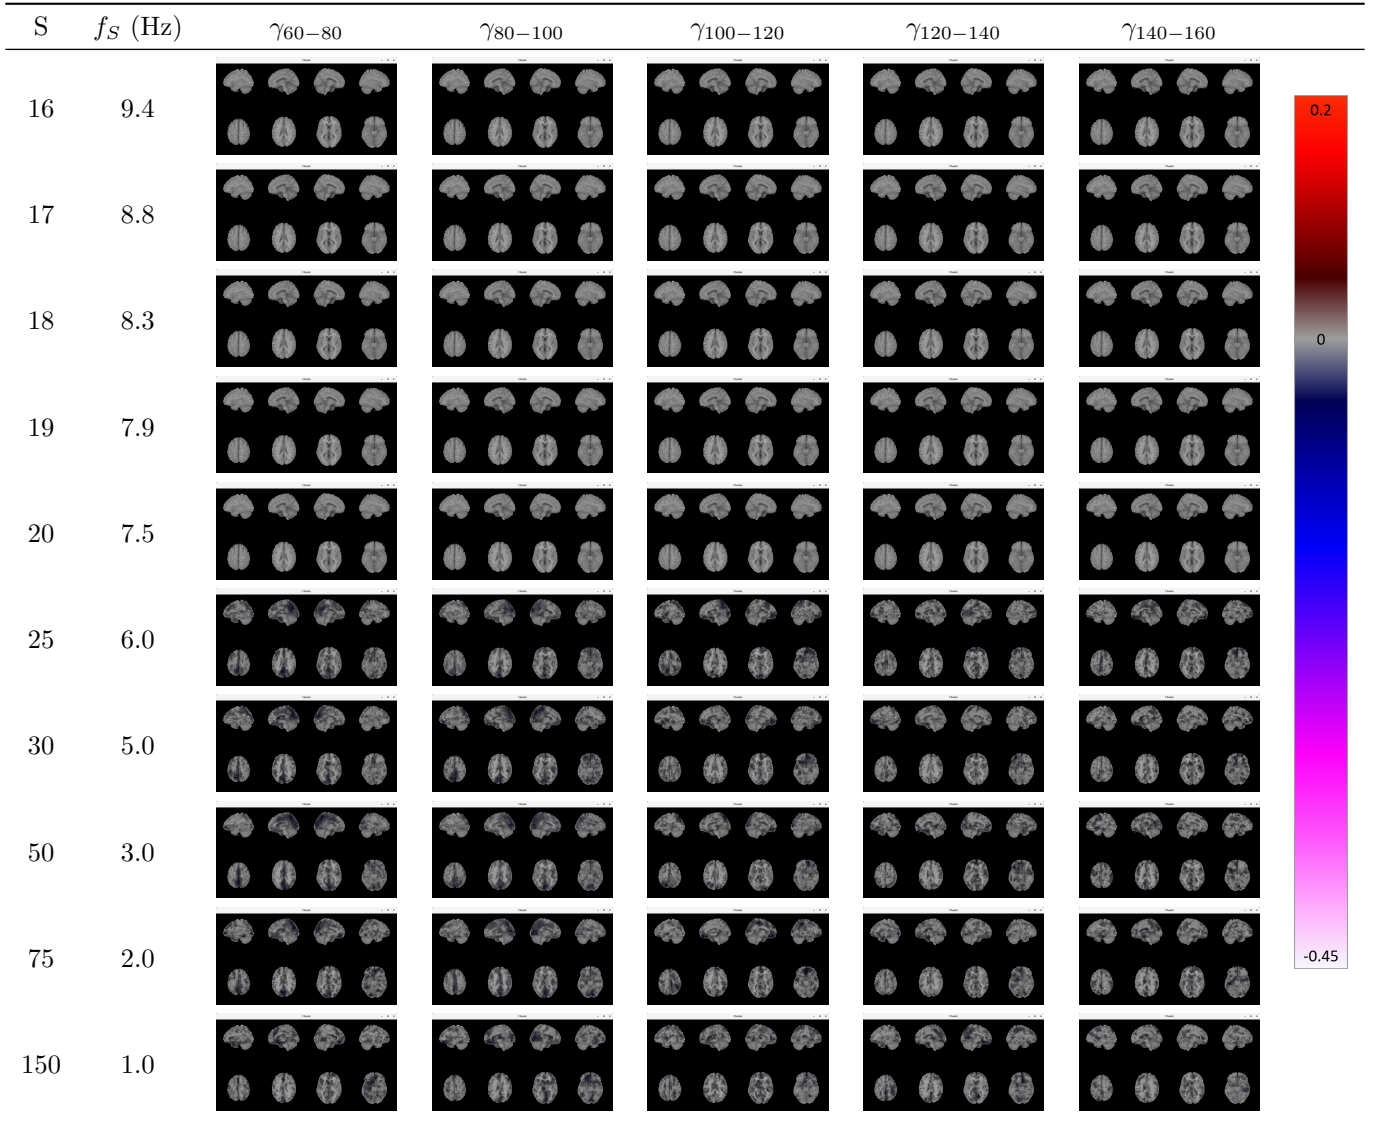

Figure 2: The whole-brain correlation between MRVE time-courses and oscillatory amplitude envelopes, for scale frequencies  $f_S = 1-150\text{Hz}$  and frequency bands 60-80Hz ( $\gamma_{60-80}$ ), 80-100Hz ( $\gamma_{80-100}$ ), 100-120Hz ( $\gamma_{100-120}$ ), 120-140Hz ( $\gamma_{120-140}$ ) and 140-160Hz ( $\gamma_{140-160}$ ). Average correlation values over subjects are displayed on a template brain where significant, as above.
